# Supplementary material for: Magnetostructural Properties of Some Doubly-Bridged Phenoxido Copper(II) Complexes
Source: MDPI journal article supplement (doi:10.3390/molecules28062648), 2023-03-14
Supplement: s1 [file s1]

# SUPPLEMENTARY MATERIALS

## Magnetostructural Properties of Some Doubly-Bridged Phenoxido Copper(II) Complexes

Salah S. Massoud <sup>1,2,\*</sup>, Febbee R. Louka <sup>1</sup>, Madison T. Dial <sup>1</sup>, Nahed N. M. H. Salem <sup>2</sup>,  
Roland C. Fischer <sup>3</sup>, Ana Torvisco <sup>3</sup>, Franz A. Mautner <sup>4</sup>, Kai Nakashima <sup>5</sup>,  
Makoto Handa <sup>5</sup> and Masahiro Mikuriya <sup>6,\*</sup>

<sup>1</sup> *Department of Chemistry, University of Louisiana at Lafayette, P.O. Box 43700, Lafayette, LA 70504, USA*

<sup>2</sup> *Department of Chemistry, Faculty of Science, Alexandria University, Moharam Bey, 21511 Alexandria, Egypt*

<sup>3</sup> *Institut für Anorganische Chemische, Technische Universität Graz, Stremayrgasse 9/V, A-8010 Graz, Austria*

<sup>4</sup> *Institut für Physikalische and Theoretische Chemie, Technische Universität Graz, Stremayrgasse 9/II, A-8010, Graz, Austria*

<sup>5</sup> *Department of Chemistry, Interdisciplinary Graduate School of Science and Engineering, Shimane University, 1060 Nishikawatsu, Matsue 690-8504 Japan*

<sup>6</sup> *Department of Applied Chemistry for Environment, School of Biological and Environmental Sciences, Kwansei Gakuin University, 1 Gakuen Uegahara, Sanda 669-1330 Japan*

| <b><u>Contents</u></b>                                                                             | <b><u>page #</u></b> |
|----------------------------------------------------------------------------------------------------|----------------------|
| Figure S1. Packing view of <b>3</b> .....                                                          | S2                   |
| Figure S2. Packing view of <b>4</b> .....                                                          | S2                   |
| Figure S3. Packing view of <b>9</b> .....                                                          | S3                   |
| Table S1. Crystallographic data and processing parameters of <b>3, 4 and 9</b> .....               | S4                   |
| Figure S4. Temperature dependence of magnetic susceptibility and magnetic moment of <b>2</b> ..... | S5                   |

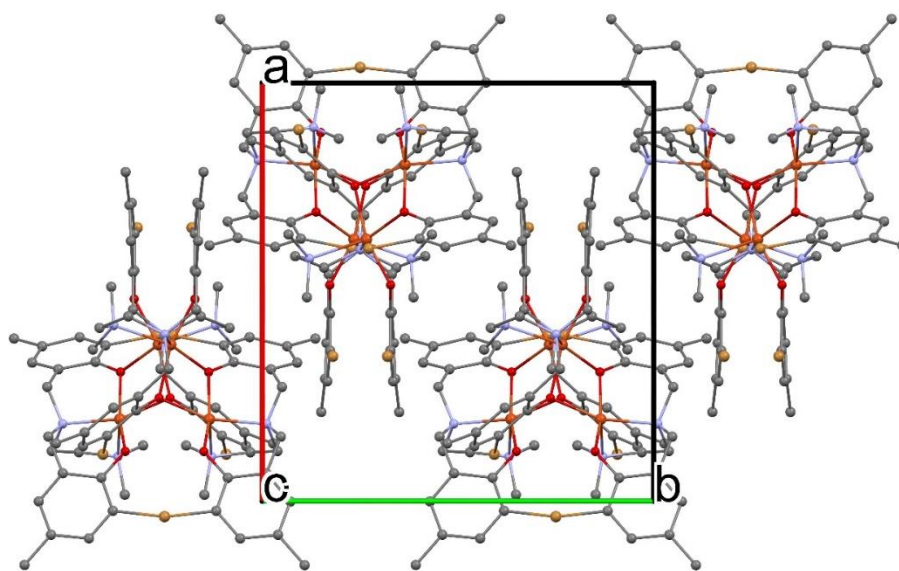

**Figure S1.** Packing view of **3**

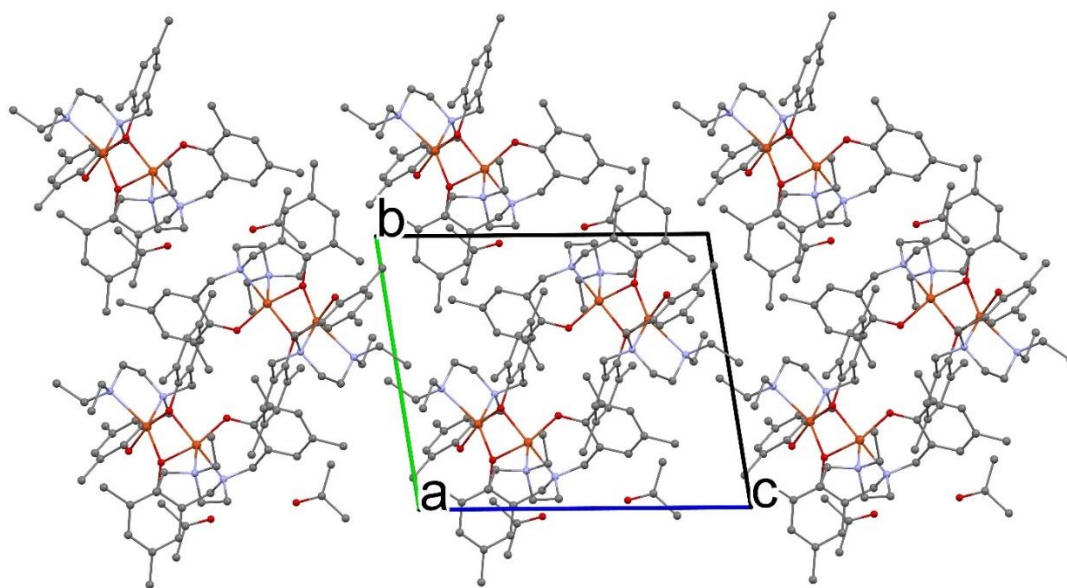

**Figure S2.** Packing view of **4**

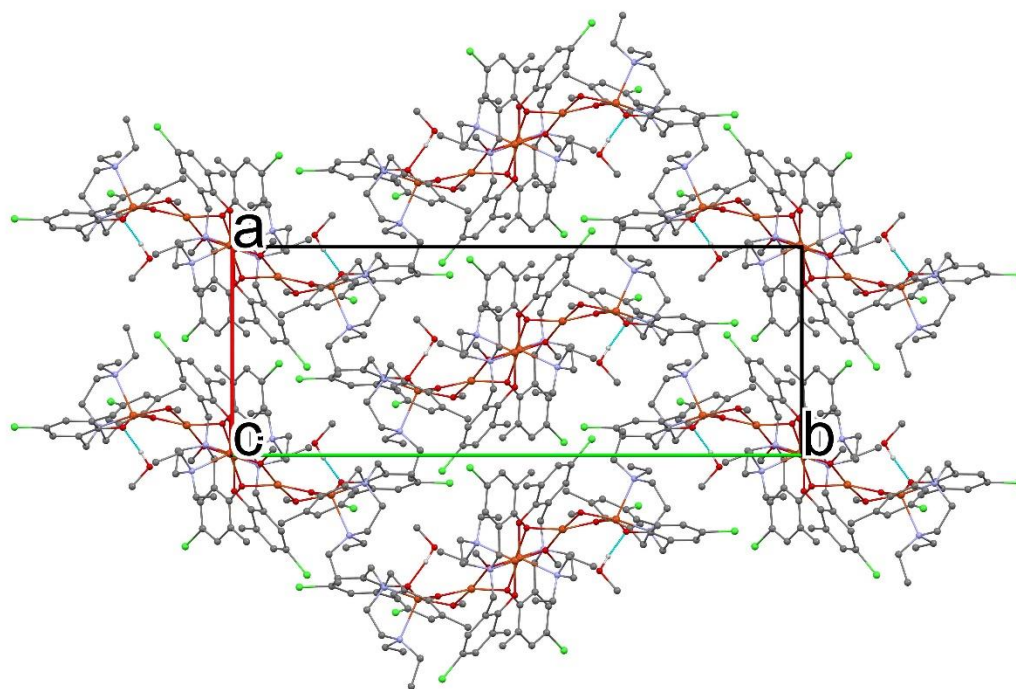

**Figure S3.** Packing view of **9**

Table S1. Crystallographic data and processing parameters of **3**, **4** and **9**.

| Compound                          | <b>3</b>                                                                                      | <b>4</b>                                                                      | <b>9</b>                                                                                      |
|-----------------------------------|-----------------------------------------------------------------------------------------------|-------------------------------------------------------------------------------|-----------------------------------------------------------------------------------------------|
| Empirical formula                 | C <sub>40</sub> H <sub>48</sub> Br <sub>4</sub> Cu <sub>2</sub> N <sub>4</sub> O <sub>4</sub> | C <sub>51</sub> H <sub>74</sub> Cu <sub>2</sub> N <sub>4</sub> O <sub>5</sub> | C <sub>47</sub> H <sub>62</sub> Cl <sub>4</sub> Cu <sub>3</sub> N <sub>4</sub> O <sub>7</sub> |
| Formula mass                      | 1095.53                                                                                       | 950.22                                                                        | 1131.45                                                                                       |
| System                            | Monoclinic                                                                                    | Triclinic                                                                     | Monoclinic                                                                                    |
| Space group                       | P2 <sub>1</sub> /c                                                                            | P-1                                                                           | P2 <sub>1</sub> /n                                                                            |
| a (Å)                             | 15.433(3)                                                                                     | 12.6538(12)                                                                   | 10.7647(5)                                                                                    |
| b (Å)                             | 14.198(3)                                                                                     | 13.0192(12)                                                                   | 29.4374(14)                                                                                   |
| c (Å)                             | 20.973(4)                                                                                     | 15.4646(15)                                                                   | 16.5922(8)                                                                                    |
| $\alpha$ (°)                      | 90                                                                                            | 95.347(5)                                                                     | 90                                                                                            |
| $\beta$ (°)                       | 100.460(7)                                                                                    | 101.633(5)                                                                    | 90.673(2)                                                                                     |
| $\gamma$ (°)                      | 90                                                                                            | 103.880(4)                                                                    | 90                                                                                            |
| V (Å <sup>3</sup> )               | 4519.2(16)                                                                                    | 2395.5(4)                                                                     | 5275.5(4)                                                                                     |
| Z                                 | 4                                                                                             | 2                                                                             | 4                                                                                             |
| $\theta$ max (°)                  | 26.000                                                                                        | 30.558                                                                        | 24.999                                                                                        |
| Data collected                    | 82442                                                                                         | 133738                                                                        | 159804                                                                                        |
| Unique refl.                      | 8840                                                                                          | 14144                                                                         | 9251                                                                                          |
| Parameters                        | 495                                                                                           | 573                                                                           | 600                                                                                           |
| Goodness-of-Fit on F <sup>2</sup> | 1.069                                                                                         | 1.057                                                                         | 1.109                                                                                         |
| R1 / wR2 (all data)               | 0.1102 / 0.2845                                                                               | 0.0528 / 0.1336                                                               | 0.0357 / 0.0923                                                                               |

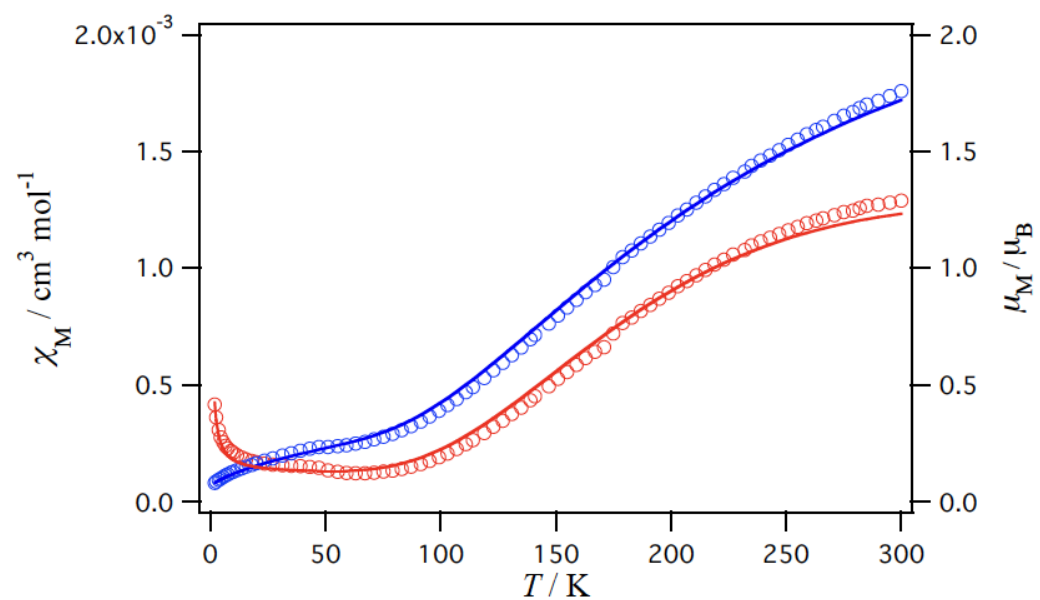

**Figure S4.** Temperature dependence of magnetic susceptibility  $\chi_M$  (○) and magnetic moment  $\mu_{\text{eff}}$  (○) of **2**.

---
